# Supplementary material for: Cryptochrome Interacts With Actin and Enhances Eye-Mediated Light Sensitivity of the Circadian Clock in Drosophila melanogaster
Source: PubMed Central journal article supplement (PMC6058042; doi:10.3389/fnmol.2018.00238), 2018-07-18
Supplement: Image_8.pdf [file Image_8.pdf]

*cry<sup>01</sup>* (WT<sub>CantonS</sub>)

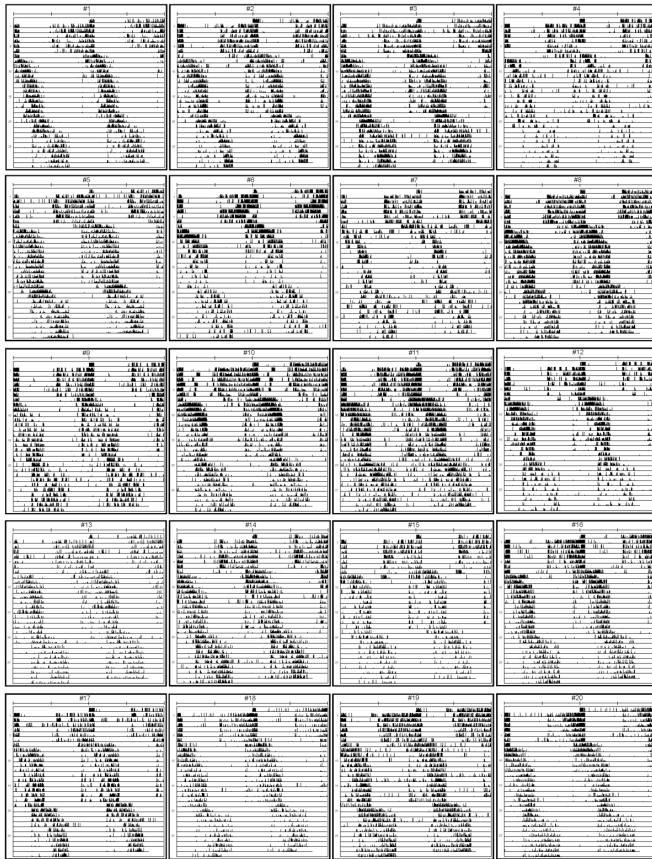

WT<sub>CantonS</sub>

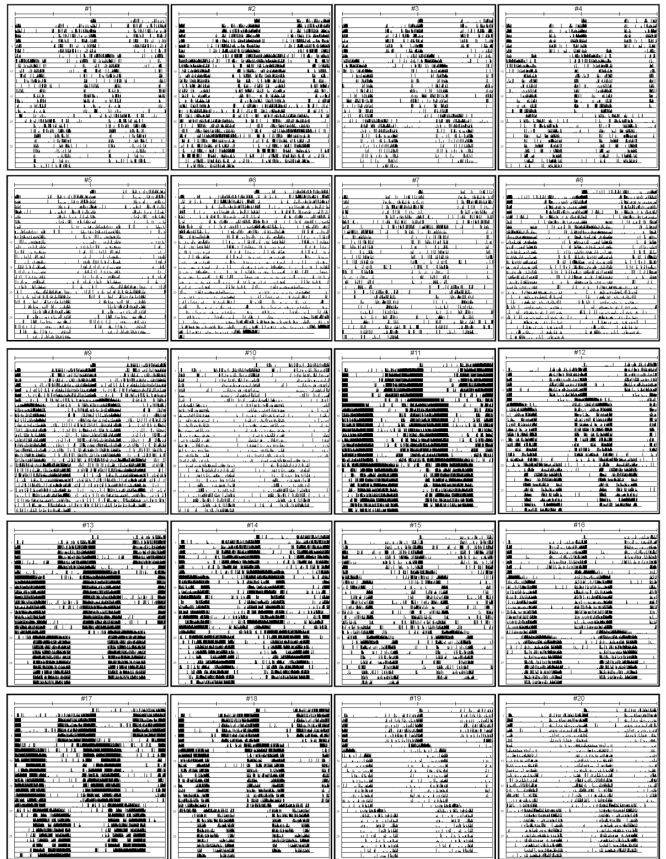

*cry<sup>01</sup>* (WT<sub>Lindelbach</sub>)

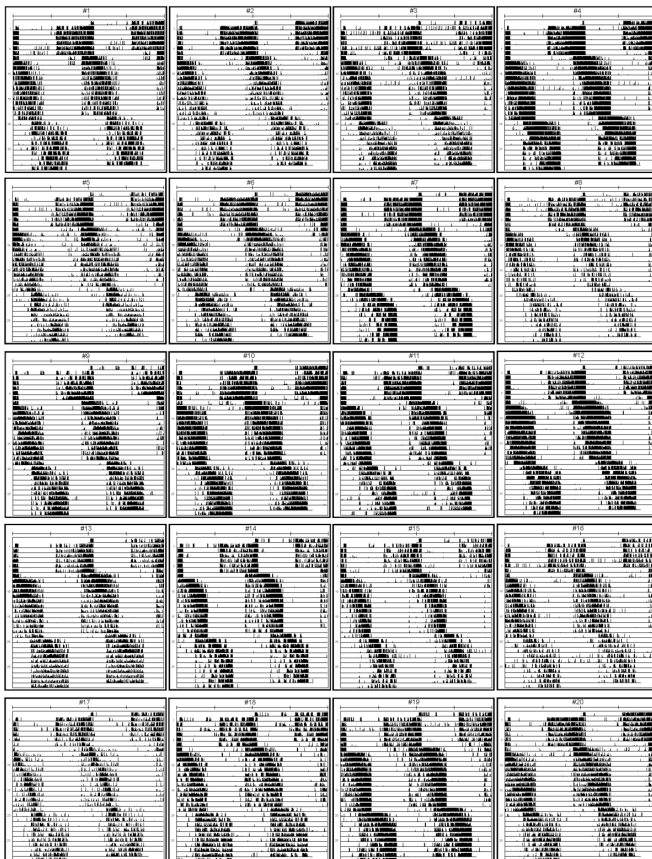

WT<sub>Lindelbach</sub>

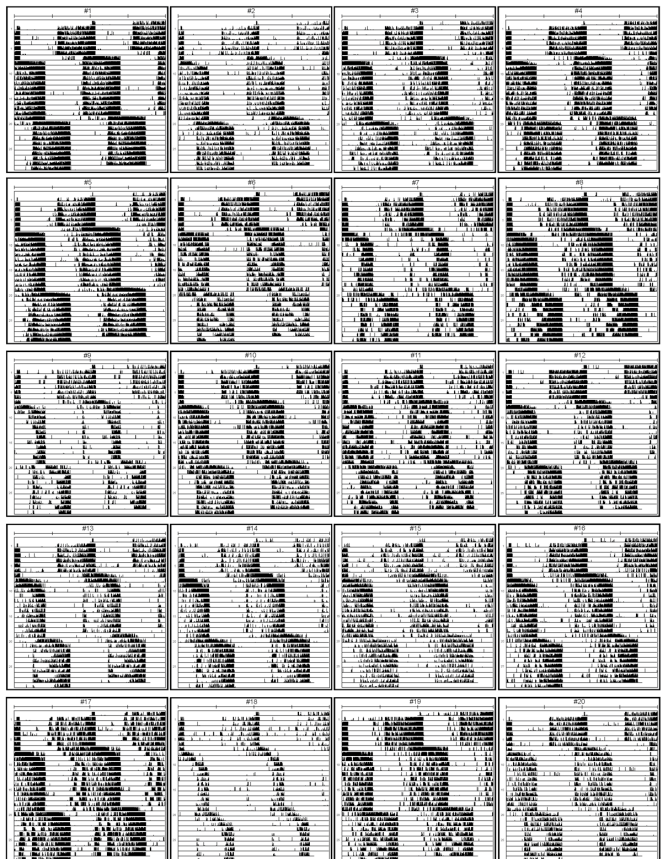

Figure S8. Individual actograms of wildtype flies and *cry<sup>01</sup>* mutants in two different backgrounds (CantonS and Lindelbach) that were subjected to a 8h shift of a 12:12h red light dark cycle.
