# Supplementary material for: Cryptochrome Interacts With Actin and Enhances Eye-Mediated Light Sensitivity of the Circadian Clock in Drosophila melanogaster
Source: PubMed Central journal article supplement (PMC6058042; doi:10.3389/fnmol.2018.00238), 2018-07-18
Supplement: Image_9.pdf [file Image_9.pdf]

*cry<sup>01</sup> ninaE-gal4* control

*cry<sup>01</sup> uas-cry* control

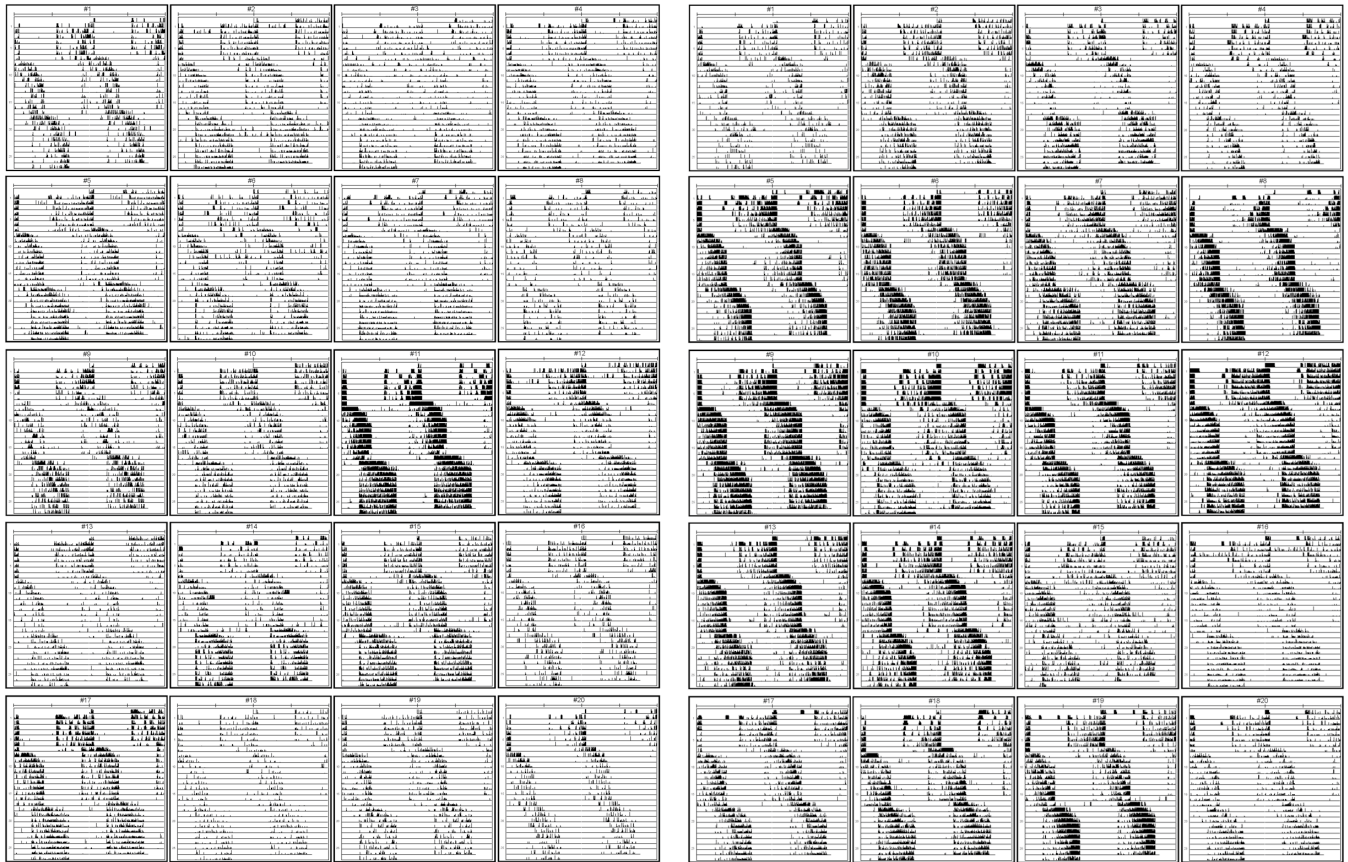

*cry<sup>01</sup> ninaE-gal4 uas-cry*

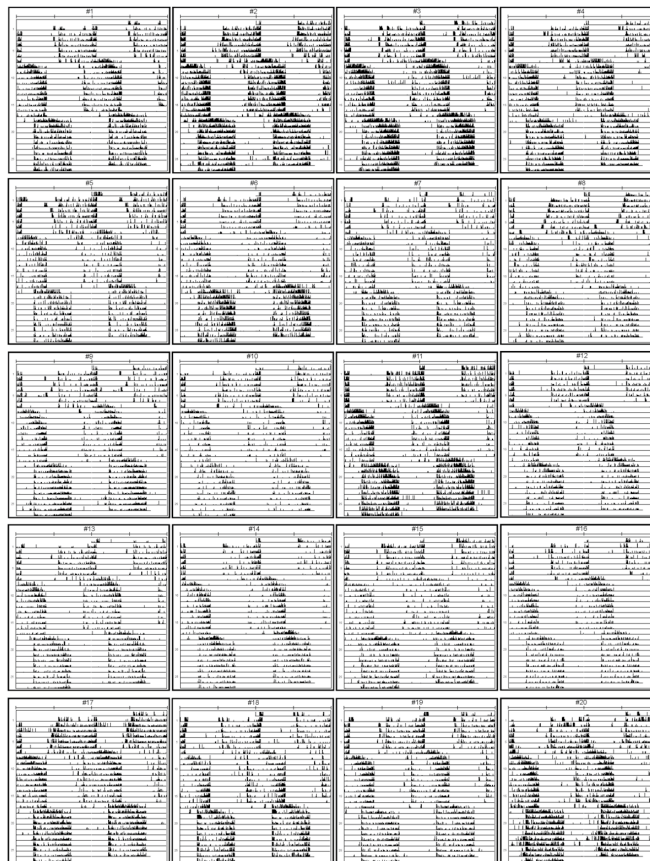

Figure S9. Individual actograms of *cry<sup>01</sup>* mutant controls (upper two panels) and *cry<sup>01</sup>* mutants, in which CRY was rescued in photoreceptors 1 to 6 (lower panel).
